# Supplementary material
Source: publisher figshare collection journal article supplement (https://rs.figshare.com/ndownloader/files/25431563)
Supplement: Supplementary file 1 [file 25431563]

## Sheet: Sheet1
Table S10. Results for the PGLS between hand-wing index (HWI) and habitat specialization (WSE and non-WSE species)
dataset	F-statistic	R2	p-value
JT	0.059	-0.02	0.8
ML	0.281	-0.01	0.59
BI	0.329	-0.01	0.56
